# Supplementary material for: A Novel Squirrel Respirovirus with Putative Zoonotic Potential
Source: PubMed Central journal article supplement (PMC6070802; doi:10.3390/v10070373), 2018-07-18
Supplement: viruses-10-00373-s001.pdf [file viruses-10-00373-s001.pdf]

## Supplementary Materials

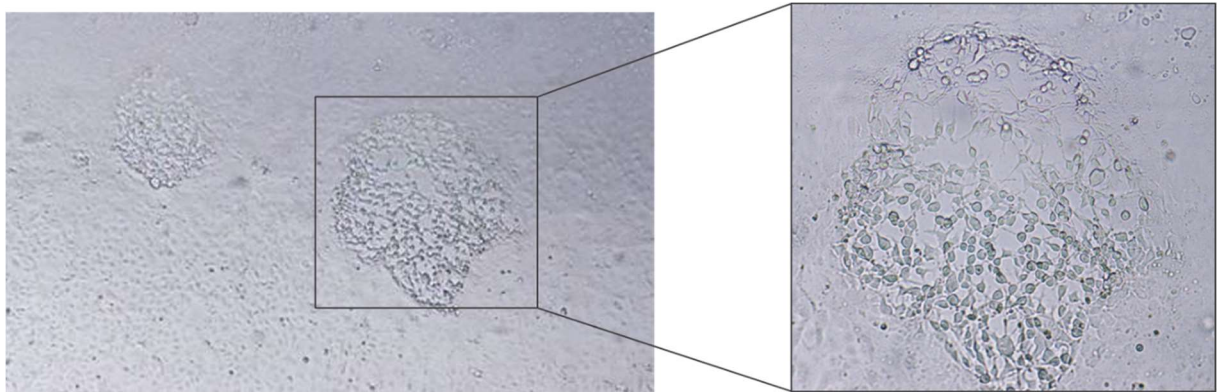

**Figure S1.** Cytopathic effect of Giant squirrel respirovirus (GSqRV) on primary porcine thyroid cells.

**Table S1.** Detected sequence variants in the Giant squirrel respirovirus (GSqRV) genome. The cut-off for determining reliable variants was set at a variant frequency of 10%.

| Position  | Affected CDS      | Nucleotide Exchange | Amino Acid Exchange | Variant Frequency [%] | Variant P-Value |
|-----------|-------------------|---------------------|---------------------|-----------------------|-----------------|
| 989       | N                 | A -> G              | no                  | 33.4                  | 0.0             |
| 2145      | P                 | T -> C              | V -> A              | 35.0                  | 0.0             |
| 2145      | C', C, Y0, Y1, Y2 | T -> C              | Y -> H              | 35.0                  | 0.0             |
| 2572      | P                 | A -> G              | no                  | 35.4                  | 0.0             |
| 7338-7339 | H                 | AA -> GC            | N -> A              | 34.0                  | 0.0             |
| 7368      | H                 | C -> T              | no                  | 35.2                  | 0.0             |
| 8078      | H                 | C -> T              | no                  | 14.4                  | 2.2E-292        |
| 8216      | H                 | G -> A              | no                  | 48.1                  | 0.0             |
| 9491      | L                 | G -> A              | no                  | 33.0                  | 0.0             |
| 10,026    | L                 | C -> T              | no                  | 30.6                  | 0.0             |
| 10,262    | L                 | G -> A              | no                  | 30.8                  | 0.0             |
| 12,578    | L                 | A -> C              | no                  | 33.1                  | 0.0             |

**Table S2.** Sequence alignment identities of individual GSqRV coding sequences (CDS) to murine respirovirus (MRV, strain Nagoya, NC\_001552) and human respirovirus 1 (HRV1, strain Washington/1964, NC\_003461) CDS.

| CDS | Nucleotide sequence identity [%] to |      | Amino acid sequence identity [%] to |      |
|-----|-------------------------------------|------|-------------------------------------|------|
|     | MRV                                 | HRV1 | MRV                                 | HRV1 |
| N   | 71.6                                | 71.2 | 75.3                                | 69.0 |
| C'  | 73.0                                | 69.0 | 72.6                                | 66.2 |
| P   | 66.6                                | 62.2 | 55.4                                | 48.5 |
| C   | 73.0                                | 69.8 | 72.5                                | 67.6 |
| Y1  | 74.8                                | 70.9 | 73.5                                | 71.3 |
| Y2  | 74.7                                | 70.1 | 74.3                                | 70.3 |
| M   | 77.0                                | 76.2 | 88.8                                | 86.5 |
| F   | 68.6                                | 63.0 | 75.4                                | 64.9 |
| HN  | 68.2                                | 65.5 | 75.3                                | 69.0 |
| L   | 74.4                                | 73.7 | 87.5                                | 83.5 |
